# Supplementary material for: Genetic Analysis for Resistance to Sclerotinia Stem Rot, Yield and Its Component Traits in Indian Mustard [Brassica juncea (L.) Czern & Coss.]
Source: MDPI journal article supplement (doi:10.3390/plants11050671), 2022-02-28
Supplement: s1 [file s1]

**Supplementary Table S1:** Weekly averaged meteorological data during crop season of 2019-20 at CCS Haryana Agricultural University, Hisar

| Standard Meteorological Weeks | Dates                     | Temperature (° C) |         | Relative humidity (%) |         | Total Rainfall (mm) |
|-------------------------------|---------------------------|-------------------|---------|-----------------------|---------|---------------------|
|                               |                           | Maximum           | Minimum | Morning               | Evening |                     |
| 42                            | 15 October - 21 October   | 34.1              | 18.4    | 79                    | 34      | 0.0                 |
| 43                            | 22 October - 28 October   | 31.9              | 14.9    | 79                    | 31      | 0.0                 |
| 44                            | 29 October - 04 November  | 30.7              | 16.2    | 90                    | 40      | 0.0                 |
| 45                            | 05 November - 11 November | 28.4              | 12.7    | 85                    | 36      | 0.3                 |
| 46                            | 12 November - 18 November | 26.8              | 12.7    | 86                    | 41      | 0.0                 |
| 47                            | 19 November - 25 November | 26.7              | 10.9    | 88                    | 42      | 0.0                 |
| 48                            | 26 November - 02 December | 22.6              | 12.1    | 92                    | 62      | 12.0                |
| 49                            | 03 December - 09 December | 23.1              | 6.0     | 88                    | 47      | 0.0                 |
| 50                            | 10 December - 16 December | 19.2              | 8.3     | 95                    | 73      | 4.5                 |
| 51                            | 17 December - 23 December | 13.7              | 6.1     | 99                    | 81      | 0.0                 |
| 52                            | 24 December - 31 December | 11.9              | 2.6     | 97                    | 75      | 0.0                 |
| 1                             | 01 January - 07 January   | 17.3              | 5.7     | 96                    | 60      | Trace               |
| 2                             | 08 January - 14 January   | 17.7              | 5.7     | 96                    | 64      | 3.2                 |
| 3*                            | 15 January - 21 January   | 13.4              | 4.7     | 100                   | 82      | 0.0                 |
| 4*                            | 22 January - 28 January   | 19.2              | 5.0     | 96                    | 56      | 7.2                 |
| 5*                            | 29 January - 4 February   | 18.8              | 3.9     | 98                    | 61      | 0.0                 |
| 6*                            | 05 February - 11 February | 20.1              | 2.8     | 92                    | 46      | 0.0                 |
| 7                             | 12 February - 18 February | 24.7              | 4.8     | 93                    | 36      | 0.0                 |
| 8                             | 19 February - 25 February | 23.8              | 10.5    | 89                    | 61      | 10.9                |
| 9                             | 26 February - 04 Mar      | 26.0              | 12.1    | 95                    | 55      | 0.0                 |
| 10                            | 05 March - 11 March       | 23.1              | 11.7    | 90                    | 66      | 61.8                |
| 11                            | 12 March - 18 March       | 23.8              | 9.8     | 94                    | 53      | 11.6                |
| 12                            | 19 March - 25 March       | 29.2              | 14.4    | 90                    | 52      | 1.5                 |
| 13                            | 26 March - 01 April       | 27.6              | 15.3    | 92                    | 54      | 20.1                |

\*Weeks where *S. sclerotiorum* inoculation and disease assessment was done.
